# Supplementary material
Source: publisher site journal article supplement (https://www.dovepress.com/article/244699)

**Supplement Fig. 1 Selection of targeted miRNAs for circLPAR3 and targeted genes for miR-375/miR-433.** (A) The expression levels of miR-1238, miR-198, miR-370, miR-375, miR-411, miR-433, miR-561 and miR-570 in KYSE30 cells transfected with (short hairpin) sh-(negative control) NC and (short hairpin) sh-circLPAR3#1 were determined by qRT-PCR. (B) QRT-PCR was used to measure the expression levels of E2F3, E2F7, EZH1, HMGB1, HMGB3 and RUNX2 in KYSE30 cells transfected with miR-(negative control) NC, miR-375 mimic or miR-433 mimic. * *P* < 0.05.
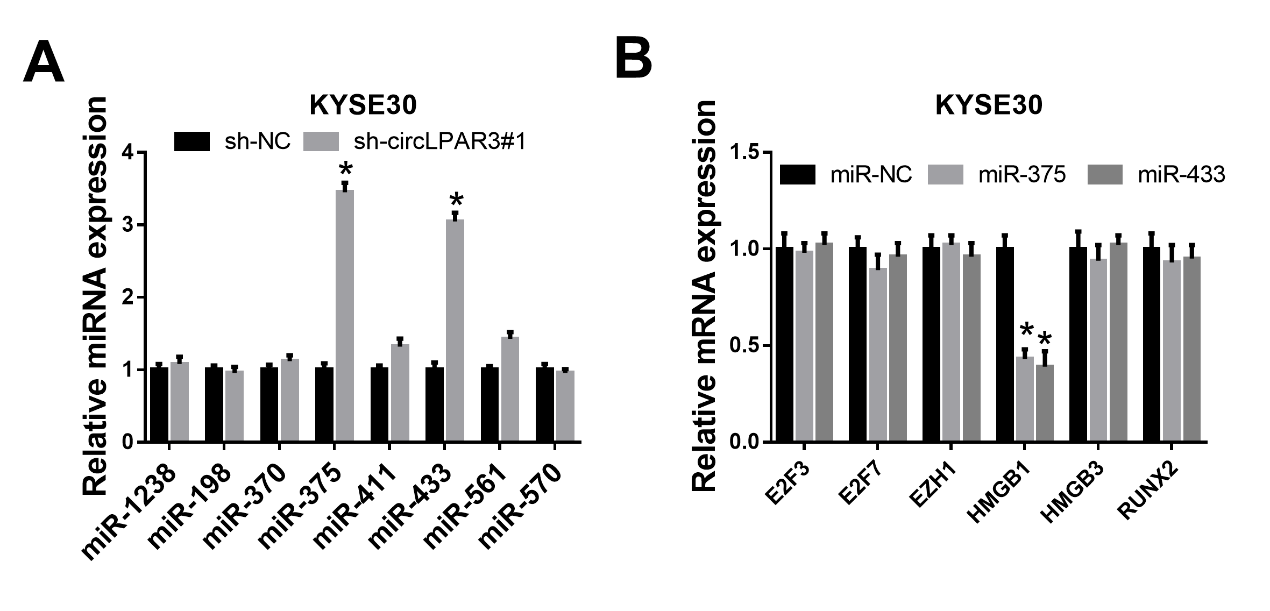

Supplement: Supplementary file 1 [file get_supplementary_file.php]
